# Supplementary material
Source: publisher figshare collection journal article supplement (https://acs.figshare.com/ndownloader/files/5818854)

#### Terms & Conditions

Electronic Supporting Information files are available without a subscription to ACS Web Editions. The American Chemical Society holds a copyright ownership interest in any copyrightable Supporting Information. Files available from the ACS website may be downloaded for personal use only. Users are not otherwise permitted to reproduce, republish, redistribute, or sell any Supporting Information from the ACS website, either in whole or in part, in either machine-readable form or any other form without permission from the American Chemical Society. For permission to reproduce, republish and redistribute this material, requesters must process their own requests via the RightsLink permission system. Information about how to use the RightsLink permission system can be found at <http://pubs.acs.org/page/copyright/permissions.html>

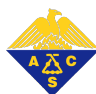

ACS Publications

MOST TRUSTED. MOST CITED. MOST READ.

Copyright © 1998 American Chemical Society

Table 3. Absolute Resonance Raman Cross Sections of *A. denitrificans* Azurin

|                            |            | excitation wavelength/nm |           |           |           |           |           |           |           |
|----------------------------|------------|--------------------------|-----------|-----------|-----------|-----------|-----------|-----------|-----------|
| $\Delta\nu/\text{cm}^{-1}$ | $ \Delta $ | 530.9                    | 566       | 568.2     | 588       | 601       | 612       | 647.1     | 676.4     |
| 212                        | 1.24       | 0.33/0.31                | 1.19/1.05 | 0.77/1.14 | 1.01/1.72 | 2.16/1.97 | 1.87/2.03 | 1.09/1.03 | 0.60/0.60 |
| 251                        | 0.69       | 0.19/0.14                | 0.47/0.47 | 0.53/0.51 | 0.88/0.76 | 0.87/0.87 | 0.88/0.90 | 0.64/0.44 | 0.26/0.26 |
| 274                        | 1.18       | 0.66/0.49                | 1.90/1.63 | 1.65/1.78 | 2.40/2.63 | 3.01/3.00 | 3.06/3.09 | 1.81/1.49 | 0.95/0.87 |
| 326                        | 0.43       | ---/0.09                 | 0.32/0.31 | 0.42/0.34 | 0.42/0.49 | 0.65/0.56 | 0.47/0.57 | 0.25/0.27 | 0.18/0.15 |
| 346                        | 0.93       | 0.14/0.51                | 1.67/1.65 | 1.56/1.80 | 2.19/2.62 | 3.26/2.95 | 2.61/3.02 | 1.61/1.39 | 0.89/0.80 |
| 360                        | 0.60       | 0.26/0.23                | 0.83/0.74 | 0.87/0.80 | 1.25/1.16 | 1.09/1.31 | 1.39/1.33 | 0.91/0.61 | 0.45/0.35 |
| 375                        | 1.27       | 1.17/1.12                | 3.47/3.63 | 4.24/3.93 | 5.74/5.71 | 6.12/6.40 | 6.69/6.51 | 4.02/2.95 | 2.16/1.68 |
| 399                        | 1.30       | 1.55/1.36                | 3.89/4.38 | 5.01/4.75 | 6.74/6.86 | 7.18/7.67 | 7.83/7.77 | 4.56/4.47 | 2.98/1.97 |
| 412                        | 1.28       | 1.87/1.42                | 4.30/4.56 | 5.78/4.94 | 7.33/7.11 | 7.76/7.93 | 8.04/8.03 | 4.45/3.56 | 2.60/2.01 |
| 428                        | 1.08       | 1.29/1.11                | 3.07/3.55 | 4.30/3.85 | 5.64/5.52 | 5.94/6.14 | 6.30/6.20 | 3.66/2.72 | 2.26/1.53 |
| 443                        | 0.43       | 0.19/0.19                | 0.48/0.59 | 0.76/0.64 | 1.01/0.92 | 0.74/1.02 | 1.05/1.02 | 0.62/0.45 | 0.36/0.25 |
| 460                        | 0.58       | 0.40/0.37                | 1.03/1.18 | 1.46/1.28 | 1.93/1.82 | 1.75/2.02 | 2.05/2.03 | 1.29/0.87 | 0.72/0.49 |
| 654                        | 0.22       | 0.18/0.12                | 0.55/0.37 | 0.24/0.40 | 0.30/0.54 | 0.53/0.58 | 0.58/0.57 | 0.34/0.22 | 0.19/0.12 |

The resonance Raman cross sections are shown as experimental/calculated in units of  $\text{\AA}^2/\text{molecule}/10^{-10}$ . A --- indicates no cross section was measured. The errors in cross sections are  $\pm 10\%$  for strong lines and  $\pm 20\%$  for weak lines. The  $\Delta$ 's are in dimensionless normal coordinates. The cross-sections were calculated with Equation 1 using the following parameters: zero-zero energy,  $E_0 = 14,300 \text{ cm}^{-1}$ , transition length,  $M = 0.73 \text{ \AA}$ , temperature,  $T = 0 \text{ K}$ , refractive index,  $n = 1.33$ , Lorentzian homogeneous linewidth,  $\Gamma_L = 450 \text{ cm}^{-1}$ , Gaussian homogeneous linewidth,  $\Gamma_G = 75 \text{ cm}^{-1}$  inhomogeneous linewidth,  $\Theta = 150 \text{ cm}^{-1}$ .

### Figure Legend

**Figure 8:** Resonance Raman spectra of *A. denitrificans* azurin at excitation wavelengths throughout the absorption band. The spectra are the sum of three to five scans. The vibrations between 200 and 500  $\text{cm}^{-1}$ , and the peak at 654  $\text{cm}^{-1}$  were used in the analysis. Raman scattering of the internal intensity standard (cacodylate) is observed at 608 and 638  $\text{cm}^{-1}$  (\*). The broad band at ~820  $\text{cm}^{-1}$  and the narrower band at ~755  $\text{cm}^{-1}$  (\*\*) are composed of the overtones and combinations of the azurin vibrations between 350 and 500  $\text{cm}^{-1}$  and a cacodylate peak at 825  $\text{cm}^{-1}$ .

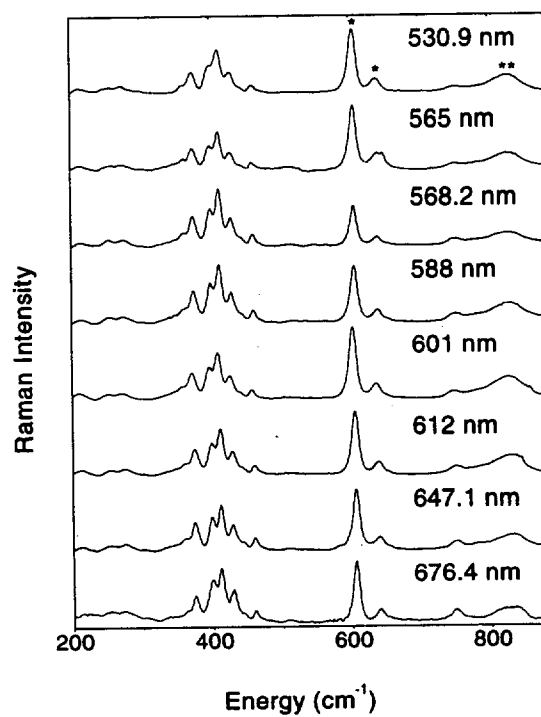

Supplement: Supplementary file 1 [file 5818854]
